# Supplementary material
Source: Springer Nature journal article supplement (https://www.springermedizin.de/resource/supplementary/12873_2012_154_MOESM2_ESM.pdf/9431518)
Supplement: MOESM2 [file 9431518]

# Kaplan-Meier survival estimates for the general population

**Probability of survival**

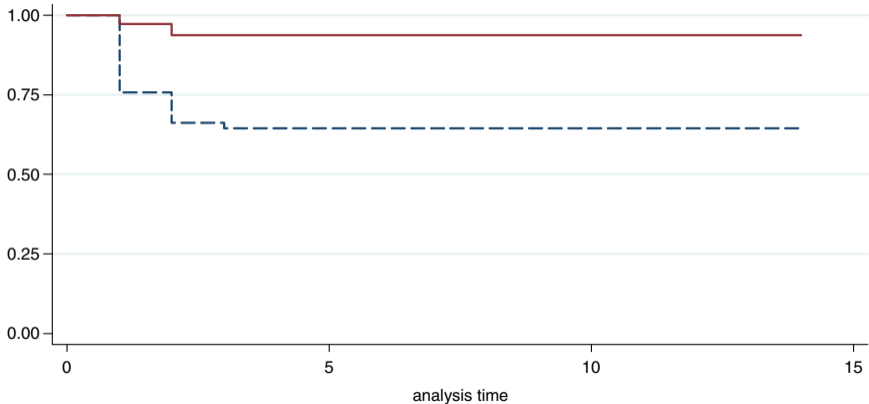

--- ATC=1

— Non ATC=2
